# Supplementary material for: G-CSF (filgrastim) treatment for amyotrophic lateral sclerosis: protocol for a phase II randomised, double-blind, placebo-controlled, parallel group, multicentre clinical study (STEMALS-II trial)
Source: PubMed Central journal article supplement — BMJ Open. 2020 Mar 23;10(3):e034049. doi: 10.1136/bmjopen-2019-034049 (PMC7202695; doi:10.1136/bmjopen-2019-034049), 2020-03-23
Supplement: bmjopen-2019-034049supp001.pdf [file bmjopen-2019-034049supp001.pdf]

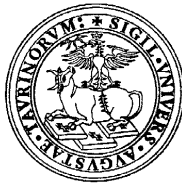

UNIVERSITA' DEGLI STUDI DI TORINO  
DIPARTIMENTO DI NEUROSCIENZE  
"Rita Levi Montalcini"  
SC Neurologia 2 U  
Centro Regionale Esperto per la Sclerosi Laterale Amiotrofica (CRESLA)  
Responsabile: Prof. Adriano Chiò  
Via Cherasco 15 - 10126 Torino  
Tel. +39-(0)11-6335439  
Fax +39-(0)11-6963487

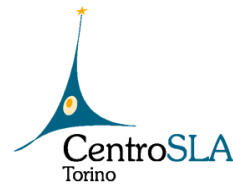

## FOGLIO INFORMATIVO PER IL PAZIENTE

### STUDIO MULTICENTRICO, A DOPPIO CIECO, CONTROLLATO CON PLACEBO, A GRUPPI PARALLELI SUL TRATTAMENTO CON G-CSF NELLA SCLEROSI LATERALE AMIOTROFICA (STEMALS-II)

#### Introduzione

Lei è invitato a partecipare a una ricerca. Prima di decidere è importante che Lei comprenda perché la ricerca viene eseguita e che cosa essa comporti. La preghiamo di dedicare un po' di tempo all'attenta lettura delle informazioni che qui seguono e di discuterle con altre persone se lo desidera. Se vi è qualcosa che non Le risulta chiara o se desidera ricevere maggiori informazioni La preghiamo di parlarne con il medico che La seguirà in questo studio.

La ringraziamo per la lettura di questo documento.

#### Qual è lo scopo di questo studio?

Questa ricerca è organizzata per studiare l'efficacia di un trattamento con granulochine (farmaci che inducono la liberazione di cellule staminali ematopoietiche) in pazienti affetti da sclerosi laterale amiotrofica.

#### Perché mi è stato proposto?

I pazienti a cui viene proposta la partecipazione allo studio presentano caratteristiche di malattia apparentemente compatibili con i criteri di inclusione (gravità di malattia, relativa normalità della funzione respiratoria,...).

#### Sono obbligato a partecipare?

No, Lei non è obbligato a partecipare a questo studio. La Sua partecipazione è del tutto volontaria e Lei può lasciare lo studio in qualunque momento senza dover giustificare i motivi.

Se Lei decide di partecipare, Le sarà consegnato questo Foglio Informativo da conservare e Le sarà richiesto di firmare un Modulo di Consenso Informato. Se Lei non è in grado di firmare il modulo, potrà esprimere il proprio consenso verbalmente in presenza di un testimone.

Lei resterà libero di lasciare lo studio in qualunque momento senza fornire giustificazioni.

Se Lei decide di lasciare lo studio, o se Lei decide di non partecipare del tutto, ciò non influirà sulla qualità e sullo standard delle cure che Lei riceverà.

**Cosa accadrà se decido di partecipare?**

Dopo aver firmato il Modulo di Consenso Informato, Le sarà richiesto di venire in ospedale per eseguire una serie di controlli per verificare se è adatto all'inclusione nello studio, compreso un prelievo di midollo osseo dalla cresta iliaca e una puntura lombare per il prelievo del liquor.

Le verrà inoltre prelevata una piccola quantità di sangue per l'analisi genetica per verificare la presenza di eventuali mutazioni o espansioni relativamente ai geni noti coinvolti nella SLA (SOD1, TARDBP, FUS, C9orf72). Qualora Lei abbia già eseguito tale valutazione genetica, Le chiediamo di fornirci copia del referto dell'indagine, che verrà conservato nella documentazione dello studio.

Se risulterà idoneo, verrà sottoposto a una randomizzazione per inserirLa in un gruppo che riceverà il farmaco attivo (*filgrastim*) oppure in un gruppo che riceverà una sostanza inerte (placebo).

Sarà sottoposto a un primo ciclo di trattamento con granulochine per via endovenosa per quattro giorni consecutivi e mannitolo per via endovenosa per cinque giorni. Il mannitolo ha lo scopo di favorire l'ingresso nel sistema nervoso centrale delle cellule staminali ematopoietiche presenti nel circolo vascolare. Nella quarta giornata di trattamento con granulochine al termine del primo e del terzo ciclo, sarà nuovamente sottoposto a una puntura lombare, necessaria per verificare la presenza di cellule staminali ematopoietiche nel liquido cefalorachidiano. Una parte del liquor prelevato verrà analizzata presso il nostro centro, una parte sarà inviata all'Istituto di Ricerche Farmacologiche "Mario Negri" (IRFMN) per la quantificazione dei livelli di chemochine e citochine.

Il ciclo di trattamento con granulochine e mannitolo sarà ripetuto per altre tre volte, a distanza di tre mesi una dall'altra. Il trattamento potrà essere sospeso nel caso in cui:

- Lei decida di lasciare lo studio;
- il medico che La segue decida di farLa uscire dallo studio a causa di un evento avverso non tollerabile;
- i dati sulla sicurezza d'impiego delle granulochine non risultino accettabili.

Sino a quel momento, ogni visita comprenderà un esame obiettivo generale, un esame obiettivo neurologico, la valutazione della funzionalità respiratoria e un questionario sulla qualità della vita. Verranno anche prelevati un campione di urina e una piccola quantità di sangue per gli esami di laboratorio e Le verrà chiesto se ha avvertito o sta avvertendo effetti collaterali.

La prima visita includerà anche la raccolta della Sua storia clinica completa e la determinazione della Sua idoneità a partecipare allo studio.

**Cosa devo fare?**

Lei riceverà le granulochine e il mannitolo 2 volte al giorno per via endovenosa per un ciclo di 4 giorni consecutivi. Le sarà somministrato mannitolo un ulteriore 5° giorno.

E' importante che Lei riferisca ai medici che La seguono durante lo studio se avverte effetti secondari o se non si sente bene durante lo studio. La preghiamo di riferire al medico che La segue nello studio se Lei sta prendendo altri farmaci prima di decidere di partecipare allo studio. Lei deve anche consultarsi con lui prima di assumere qualunque farmaco nel corso dello studio.

Se Lei decide di partecipare allo studio, lo comunicheremo al Suo medico di famiglia. Egli potrà contattare il personale che La segue nello studio prima di prescriverle qualsiasi trattamento.

**Quali sono gli obiettivi dello studio?**

L'obiettivo dello studio è verificare se la somministrazione di granulochine determina un effetto positivo sul decorso della sclerosi laterale amiotrofica, riducendone la velocità di progressione. Ciò sarà ottenuto confrontando i pazienti che sono trattati con il farmaco e quelli che sono trattati con il placebo. Inoltre verrà valutato se il trattamento causa effetti avversi.

**Quali sono i possibili rischi ed effetti collaterali collegati alla partecipazione allo studio?**

Le granulochine sono abitualmente somministrate a pazienti con linfomi, leucemie e altre malattie del sangue. In questi pazienti appaiono molto ben tollerate. Tuttavia sono conosciuti effetti indesiderati comuni e non comuni come riportato in tabella:

| Classificazione per sistemi e organi                                            | Frequenza    | Effetto indesiderato                        |
|---------------------------------------------------------------------------------|--------------|---------------------------------------------|
| <i>Patologie del sistema emolinfopoietico</i>                                   | Molto comune | Leucocitosi, trombocitopenia                |
|                                                                                 | Non comune   | Disturbi alla milza                         |
| <i>Disturbi del metabolismo e della nutrizione</i>                              | Comune       | Elevati livelli di fosfatasi alcalina e LDH |
|                                                                                 | Non comune   | Aumento delle SGOT, iperuricemia            |
| <i>Patologie del sistema nervoso</i>                                            | Molto comune | Cefalea                                     |
| <i>Patologie vascolari</i>                                                      | Non comune   | Sindrome da perdita capillare               |
| <i>Patologie del sistema muscoloscheletrico e del tessuto connettivo</i>        | Molto comune | Dolore muscoloscheletrico                   |
|                                                                                 | Non comune   | Esacerbazione dell'artrite reumatoide       |
| <i>Patologie sistemiche e condizioni relative alla sede di somministrazione</i> | Non comune   | Reazione allergica grave                    |
| <i>Patologie della cute e del tessuto sottocutaneo</i>                          | Non comune   | Sindrome di Sweet, vasculite cutanea        |

Dal momento che tra gli effetti indesiderati i più comuni sono cefalea e dolori muscoloscheletrici (sindrome similinfluenzale) a tutti i pazienti arruolati, sia trattati con filgrastim che con placebo, verrà somministrato durante ogni ciclo paracetamolo per via endovenosa.

Le donne in età fertile dovranno utilizzare un metodo per evitare la gravidanza durante la partecipazione allo studio. Valuti insieme al medico dello studio quale tipo di metodo per evitare la gravidanza utilizzare e per quanto tempo. Il farmaco in sperimentazione non presenta controindicazioni all'uso di qualsiasi metodo di contraccezione.

Durante la Sua partecipazione allo studio, il medico che La segue potrà riscontrare la presenza di altre condizioni patologiche di cui Lei non era a conoscenza e dovrà pertanto discuterne con Lei l'eventualità di interrompere il trattamento.

In conformità al DM 14 luglio 2009 il CRESLA - Centro Regionale Esperto per la Sclerosi Laterale Amiotrofica che ha commissionato lo studio ha in corso polizza di assicurazione a copertura dei danni cagionati ai soggetti dall'attività di questa ricerca per l'intero periodo della stessa e della responsabilità civile dello sperimentatore e del promotore, senza esclusione dei danni involontariamente cagionati in conseguenza di un fatto accidentale e/o imputabili a negligenza, imprudenza o imperizia.

La polizza, stipulata con la compagnia Sindacato Lloyd's 1218 Newline, prevede un risarcimento danni per persona fino ad un massimo di Euro 1.000.000,00 (un milione/00), con un massimale per il protocollo in oggetto di Euro 7.500.000,00 (settemilionicinquecentomila/00).

La polizza è operante per danni che si siano manifestati entro 36 (trentasei) mesi dalla data di conclusione della sperimentazione e la cui richiesta di risarcimento sia stata presentata entro 36 (trentasei) mesi dalla data di conclusione della sperimentazione.

Rimane fermo il diritto del soggetto a richiedere al responsabile del danno il risarcimento delle somme non coperte dal massimale sopra indicato.

Per qualsiasi domanda riguardante la garanzia di risarcimento e le cure mediche e per qualunque disturbo o danno Lei dovesse ritenere correlato alla sperimentazione, La preghiamo di contattare il Medico dello studio.

**Quali sono i possibili benefici derivanti dalla mia partecipazione?**

Noi speriamo che il trattamento possa esserLe di beneficio, tuttavia questo non può esserLe garantito. Le informazioni che ricaveremo da questo studio potranno aiutarci a trattare in futuro i pazienti con SLA.

**Cosa avverrà nel caso si rendano disponibili nuove informazioni?**

Il medico dello studio La informerà nel caso in cui nuove informazioni su questo tipo di trattamento si rendano disponibili durante lo studio. Il medico discuterà quindi con Lei se desidera continuare lo studio. Se Lei deciderà di uscire dallo studio, il medico che La segue prenderà tutti i provvedimenti necessari per la continuazione delle Sue cure. Se Lei deciderà di continuare lo studio, Le potrà essere richiesto di firmare un Modulo di Consenso aggiornato. Se Lei non fosse in grado di apporre la propria firma potrà esprimere il proprio consenso verbalmente in presenza di un testimone.

**La mia partecipazione sarà considerata riservata?**

Questo studio è promosso dai ricercatori che lo hanno progettato. I dettagli del Suo trattamento e le altre informazioni di carattere medico saranno a disposizione esclusivamente dei ricercatori coinvolti nello studio.

Le chiediamo di poter esaminare ed utilizzare i dati che emergeranno dalla Sua partecipazione allo studio, garantendo l'assoluta riservatezza sulla Sua identità ai sensi del D. Lgs. 30/06/2003 n. 196 (Codice in materia di protezione dei dati personali). Tali dati dovranno, inoltre, essere resi disponibili per eventuali controlli da parte delle Autorità Regolatorie.

Qualora i risultati dello studio venissero pubblicati, la sua identità resterà comunque segreta.

**Che ne sarà dei risultati di questo studio?**

Le informazioni provenienti da questo studio potranno essere utilizzate per pianificare in futuro altre ricerche con granulocine e cellule staminali ematopoietiche. I risultati potranno essere pubblicati, ma Lei non sarà mai in alcun modo identificabile.

**Chi organizza e finanzia la ricerca?**

La ricerca è organizzata dagli stessi ricercatori che l'hanno progettata. E' finanziata dal Ministero della Salute.

**Chi ha esaminato il protocollo dello studio?**

Lo studio è stato esaminato e approvato dal Comitato Etico dell'ospedale.

**Chi contattare per avere ulteriori informazioni?**

Se Lei ha perplessità, preoccupazioni o altre domande da fare relativamente a questo studio, prenda contatto con:

**Prof. Adriano Chiò**

**Dott. Andrea Calvo**

**Dott.ssa Cristina Moglia**

**CRESLA (Centro Regionale Esperto per la Sclerosi Laterale Amiotrofica)**

**Dipartimento di Neuroscienze "Rita Levi Montalcini" – AO Città della Salute e della Scienza di Torino**

Via Cherasco 15, 10126 Torino - Tel.: 011 6335439 Fax: 011 6963487

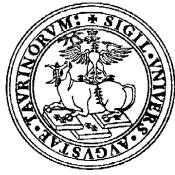

UNIVERSITA' DEGLI STUDI DI TORINO  
DIPARTIMENTO DI NEUROSCIENZE  
"Rita Levi Montalcini"  
SC Neurologia 2 U  
Centro Regionale Esperto per la Sclerosi Laterale Amiotrofica (CRESLA)  
Responsabile: Prof. Adriano Chiò  
Via Cherasco 15 - 10126 Torino  
Tel. +39-(0)11-6335439  
Fax +39-(0)11-6963487

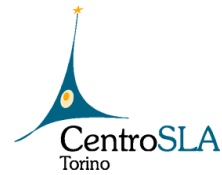

### MODULO DI CONSENSO INFORMATO

#### STUDIO MULTICENTRICO, A DOPPIO CIECO, CONTROLLATO CON PLACEBO, A GRUPPI PARALLELI SUL TRATTAMENTO CON G-CSF NELLA SCLEROSI LATERALE AMIOTROFICA (STEMALS-II)

Con la firma sottostante dichiaro:

- di aver letto il foglio informativo e di aver ricevuto spiegazioni sullo studio in un linguaggio semplice e comprensibile;
- di aver avuto l'opportunità di fare domande sullo studio al medico sperimentatore e di aver ricevuto risposte soddisfacenti così come di aver ricevuto sufficienti informazioni sullo studio, in particolare sulle finalità e sulle procedure, sulle possibili alternative diagnostiche e terapeutiche e sulle conseguenze della mancata esecuzione della procedura proposta;
- di aver avuto a disposizione tempo sufficiente per poter leggere attentamente, comprendere ed eventualmente farmi spiegare quanto contenuto nel Foglio Informativo allegato che conferma quanto mi è stato spiegato a voce, in particolare che la sperimentazione sarà condotta nel rispetto dei codici etici internazionali;
- di essere stato/a informato/a sui possibili rischi o disagi ragionevolmente prevedibili;
- di essere stato/a informato/a circa l'importanza di evitare il concepimento durante l'intero ciclo di sperimentazione;
- di essere consapevole di potermi liberamente ritirare dallo studio in ogni momento, senza darne ragione e senza incorrere in problemi o svantaggi per la mia assistenza medica futura;
- di essere consapevole che il promotore dello studio ha stipulato un'apposita polizza di Responsabilità Civile estesa anche ai danni causati durante le sperimentazioni cliniche condotte in osservanza del protocollo, in conformità al D.Lgs. n. 211 del 24/06/2003 e al DM 14 luglio 2009;
- di essere consapevole che sarò informato/a di eventuali nuovi dati che possano influenzare i rischi o i benefici, oppure di variazioni di protocollo che possano influenzarli;

- di aver ricevuto copia del foglio informativo, copia firmata e datata di questo Modulo di Consenso Informato e del Consenso al Trattamento dei Dati Personali;
- di volere partecipare volontariamente allo studio descritto.

Pertanto, sottoscrivendo questo modulo ACCONSENTO a partecipare a questo studio.

**Nome e cognome del paziente** (in stampatello) \_\_\_\_\_

**Firma del paziente** \_\_\_\_\_

**Data** \_\_\_\_\_

*Il paziente non è in grado di apporre la propria firma (deficit motorio), pertanto esprime verbalmente il proprio consenso in presenza di un testimone.*

**Nome e cognome del testimone** (in stampatello) \_\_\_\_\_

**Firma del testimone** \_\_\_\_\_

**Data** \_\_\_\_\_

**Nome e cognome del Medico Sperimentatore** \_\_\_\_\_

**Firma del Medico Sperimentatore** \_\_\_\_\_

**Data** \_\_\_\_\_

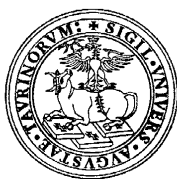

UNIVERSITA' DEGLI STUDI DI TORINO  
DIPARTIMENTO DI NEUROSCIENZE  
"Rita Levi Montalcini"  
SC Neurologia 2 U  
Centro Regionale Esperto per la Sclerosi Laterale Amiotrofica (CRESLA)  
Responsabile: Prof. Adriano Chiò  
Via Cherasco 15 - 10126 Torino  
Tel. +39-(0)11-6335439  
Fax +39-(0)11-6963487

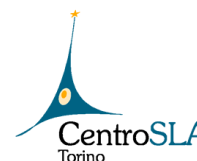

## STUDIO MULTICENTRICO, A DOPPIO CIECO, CONTROLLATO CON PLACEBO, A GRUPPI PARALLELI SUL TRATTAMENTO CON G-CSF NELLA SCLEROSI LATERALE AMIOTROFICA (STEMALS-II)

### CONSENSO PER L'ESECUZIONE DELLE ANALISI DEL DNA

Le analisi genetiche comprendono esami eseguiti sul DNA umano, sui cromosomi, sulle proteine o su qualsiasi altro prodotto genico allo scopo di individuare alterazioni nel patrimonio genetico correlati allo sviluppo di malattie. In particolare riferimento allo studio in oggetto verranno indagate le mutazioni note a carico dei geni SOD1, TARDBP, FUS e C9ORF72. Il trattamento dei dati genetici e la conservazione dei campioni è effettuato nel rispetto del Codice n.196 del 30 giugno 2003 e dell'Autorizzazione al trattamento di dati genetici - 22 febbraio 2007, G.U. n.65 del 19 marzo 2007.

Io sottoscritto/a \_\_\_\_\_

Nato/a: \_\_\_\_\_ (Prov \_\_\_\_\_), il: \_\_\_\_/\_\_\_\_/\_\_\_\_

Residente in: \_\_\_\_\_ (Prov \_\_\_\_\_), CAP: \_\_\_\_\_

Via: \_\_\_\_\_ n.: \_\_\_\_\_ Tel.: \_\_\_\_\_

DICHIARO di avere ricevuto una dettagliata informazione sugli aspetti genetici riguardanti lo studio che mi è stato proposto e di averne compreso le finalità.

Pertanto:

ACCONSENTO al prelievo di materiale biologico per l'esecuzione delle analisi del DNA relative allo studio dei geni correlati alla sclerosi laterale amiotrofica (malattia del motoneurone)

|\_ |

ACCONSENTO inoltre alla conservazione del DNA per 10 anni per eventuali studi conseguenti a quanto individuato in base a questo studio.

|\_ |

ACCONSENTO alla pubblicazione dei dati relativi al mio DNA in forma anonima

|\_ |

Mi impegno a comunicare tempestivamente ogni eventuale cambiamento di opinione in merito a quanto dichiarato.

Nome e Cognome (in stampatello) \_\_\_\_\_

Data \_\_\_\_\_ Firma \_\_\_\_\_

Firma del Medico che ha raccolto il consenso \_\_\_\_\_

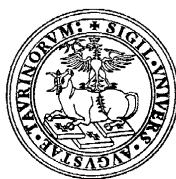

UNIVERSITA' DEGLI STUDI DI TORINO  
DIPARTIMENTO DI NEUROSCIENZE  
"Rita Levi Montalcini"  
SC Neurologia 2 U

Centro Regionale Esperto per la Sclerosi Laterale Amiotrofica (CRESLA)

Responsabile: Prof. Adriano Chiò

Via Cherasco 15 - 10126 Torino

Tel. +39-(0)11-6335439

Fax +39-(0)11-6963487

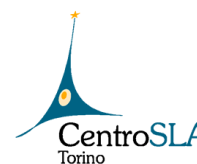

## CONSENSO ALL'UTILIZZO DEI DATI PERSONALI (D.Lgs. n.196/2003)

Gentile Signore/a,

ai sensi del D.Lgs. 196/2003, sulla tutela delle persone e di altri soggetti rispetto al trattamento dei dati personali, il trattamento delle informazioni che La riguardano sarà improntato ai principi di correttezza, liceità e trasparenza e tutelerà la Sua riservatezza e i Suoi diritti.

Il Centro di sperimentazione, A.O.U. Città della Salute e della Scienza di Torino - S.C. Neurologia 2 U - ed il Promotore, ai sensi del D.M. del 17.12.2004, CRESLA - Centro Regionale Esperto per la Sclerosi Laterale Amiotrofica - che ha commissionato lo studio che Le è stato descritto, ciascuno per gli ambiti di propria competenza e in accordo alle responsabilità previste dalle norme della buona pratica clinica (d.l. 211/2003), tratteranno i Suoi dati personali, in particolare i dati idonei a rivelare l'origine razziale ed etnica, le convinzioni religiose, filosofiche o di altro genere, le opinioni politiche, l'adesione a partiti, sindacati, associazioni od organizzazioni a carattere religioso, filosofico, politico o sindacale, nonché i dati personali idonei a rivelare lo stato di salute e la vita sessuale; tali dati potranno essere oggetto di trattamento solo con il consenso scritto dell'interessato e previa autorizzazione del Garante per la protezione dei dati personali (articolo 26).

A tal fine i dati indicati saranno raccolti da personale individuato dall'Azienda, in qualità di incaricato del trattamento dei dati.

Il trattamento dei dati personali relativi al Suo stato di salute è indispensabile allo svolgimento dello studio: il rifiuto di conferirli non Le consentirà di parteciparvi.

### Natura dei dati

Il medico che La seguirà nello studio La identificherà con un codice: i dati che La riguardano raccolti nel corso dello studio, ad eccezione del Suo nominativo, saranno registrati, elaborati e conservati unitamente a tale codice, alla Sua data di nascita, al sesso, al Suo peso e alla Sua statura. Soltanto il medico e i soggetti autorizzati, in qualità di incaricati del trattamento dei dati, potranno collegare questo codice al Suo nominativo.

### Modalità del trattamento

I dati, trattati mediante strumenti anche elettronici, saranno diffusi solo in forma rigorosamente anonima, ad esempio attraverso pubblicazioni scientifiche, statistiche e convegni scientifici. La Sua partecipazione allo studio implica che il personale del Promotore, in qualità di incaricato del trattamento dei dati, il Comitato Etico e le autorità sanitarie italiane e straniere potranno conoscere i dati che La riguardano, contenuti anche nella Sua documentazione clinica originale, con modalità tali da garantire la riservatezza della Sua identità.

**Esercizio dei diritti**

Potrà esercitare i diritti di cui all'art. 7 del Codice (es. accedere ai Suoi dati personali, integrarli, aggiornarli, rettificarli, opporsi al loro trattamento per motivi legittimi, ecc.) rivolgendosi direttamente al centro clinico o, per il suo tramite, all'Istituto Superiore di Sanità.

Potrà interrompere in ogni momento e senza fornire alcuna giustificazione la Sua partecipazione allo studio: in tal caso, i campioni biologici a Lei correlati verranno distrutti. Non saranno inoltre raccolti ulteriori dati che La riguardano, ferma restando l'utilizzazione di quelli eventualmente già raccolti per determinare, senza alterarli, i risultati della ricerca.

**Consenso**

Sottoscrivendo tale modulo ACCONSENTO al trattamento dei miei dati personali e al loro trasferimento per gli scopi della ricerca nei limiti e con le modalità indicate nell'informativa fornitami con il presente documento.

**Nome e cognome del paziente** (in stampatello) \_\_\_\_\_

**Firma del paziente** \_\_\_\_\_

**Data** \_\_\_\_\_

*Il paziente non è in grado di apporre la propria firma (deficit motorio), pertanto esprime verbalmente il proprio consenso in presenza di un testimone.*

**Nome e cognome del testimone** (in stampatello) \_\_\_\_\_

**Firma del testimone** \_\_\_\_\_

**Data** \_\_\_\_\_
